# Supplementary material for: Microphotochemistry: 4,4'-Dimethoxybenzophenone mediated photodecarboxylation reactions involving phthalimides
Source: PubMed Central journal article supplement (PMC3170193; doi:10.3762/bjoc.7.121), 2011-08-02
Supplement: Beilstein_J_Org_Chem-07-1055-s001.pdf [file Beilstein_J_Org_Chem-07-1055-s001.pdf]

# Supporting Information

for

## **Microphotochemistry: 4,4'-Dimethoxybenzophenone mediated photodecarboxylation reactions involving phthalimides**

Oksana Shvydkiv<sup>1</sup>, Kieran Nolan<sup>1</sup> and Michael Oelgemöller\*<sup>2</sup>

Address: <sup>1</sup>School of Chemical Sciences, Dublin City University, Dublin 9, Ireland and

<sup>2</sup>School of Pharmacy and Molecular Sciences, James Cook University, Townsville,  
QLD 4811, Australia.

Email: Michael Oelgemöller\* - michael.oelgemoeller@jcu.edu.au

\*Corresponding author

## **Full experimental details and NMR data**

# Experimental

## General

All commercially available starting materials and reagents were purchased from Sigma-Aldrich and were used without further purification. The syntheses of compounds **3** and **6** have been described previously [1,2]. NMR spectra were recorded on a Bruker 400 Ultrashield™ (<sup>1</sup>H: 400 MHz and <sup>13</sup>C: 100 MHz) using the residual solvent signal as internal standard. Chemical shifts ( $\delta$ ) are given in ppm; coupling constants ( $J$ ) in Hz. Melting points were determined using a Griffin Melting Point Apparatus and are uncorrected. Preparative chromatography was carried out using Merck silica gel 60 and ethyl acetate/*n*-hexane (1:1). Batch irradiations were conducted in a Rayonet RPR-200 chamber reactor (Southern New England) equipped with 16  $\times$  RPR-3500Å lamps (16  $\times$  8 W) and using Pyrex flasks. Microflow reactions were performed in a dwell device (mikroglas chemtech) under a Luzchem UV exposure panel equipped with 5  $\times$  RPR-3500Å lamps (5  $\times$  8 W). All products are literature known.

## Irradiations

**$\alpha$ -Photodecarboxylation of phthaloylglycine **1** under batch conditions:** A solution of **1** (1.5 mmol) and DMBP (0.15 mmol) in acetonitrile (100 mL) was irradiated for 1 h while a gentle stream of nitrogen was flushed through the solution. After evaporation of the solvent, the conversion was determined by <sup>1</sup>H NMR spectroscopy of the crude product. The signal integration for the NCH<sub>2</sub> protons of **1** was compared with the signal integration for the NCH<sub>3</sub> protons of **2**. For characterization purposes, a sample of **2** was furthermore isolated by column chromatography.

**$\alpha$ -Photodecarboxylation of phthaloylglycine 1 under microflow conditions:** A solution of **1** (0.225 mmol) and DMBP (22.5  $\mu$ mol) in acetonitrile (15 mL) was degassed with nitrogen and loaded into a syringe pump. The reaction mixture was pumped through the dwell device (residence time of 1 h) and was irradiated with UVA light. After evaporation of the solvent, the conversion rate was established by  $^1\text{H}$  NMR analysis.

***N*-Methylphthalimide (2).** Colorless needles;  $R_f$ : 0.62 (ethyl acetate/*n*-hexane 1:1); mp 133–134°C (lit. [3]: mp 135 °C);  $^1\text{H}$  NMR (400 MHz, acetone- $d_6$ )  $\delta$  3.11 (s, 3H, NCH<sub>3</sub>), 7.83 (m, 4H, H<sub>arom</sub>) ppm;  $^{13}\text{C}$  NMR (100 MHz, acetone- $d_6$ )  $\delta$  23.9, 123.6, 133.3, 134.8, 168.8 ppm.

**Photodecarboxylative cyclization of 3 and 6 under batch conditions:** A solution of **3** or **6** (0.75 mmol) and DMBP (75  $\mu$ mol) in an acetonitrile/water mixture (1:1 vol %, 50 mL) was irradiated for 1 h while being purged with nitrogen. Most of the acetonitrile was evaporated and the crude product mixture was extracted with CH<sub>2</sub>Cl<sub>2</sub> (3  $\times$  30 mL). The combined organic layer was washed with sat. NaHCO<sub>3</sub> (2  $\times$  30 mL), brine (2  $\times$  30 mL) and dried over MgSO<sub>4</sub>. After filtration and evaporation of the solvent, the crude products were analyzed by  $^1\text{H}$  NMR spectroscopy. The **4/5** ratio was determined by integration and comparison of a NCH<sub>2</sub> proton of **4** with the terminal CH<sub>3</sub> protons of **5**. Pure **4** and **7** were isolated by column chromatography.

**Photodecarboxylative cyclization of 3 and 6 under microflow conditions:** A solution of **3** or **6** (0.225 mmol) and DMBP (22.5  $\mu$ mol) in an acetonitrile/water mixture (1:1 vol %, 15 mL) was purged with nitrogen and loaded into a syringe pump. The reaction mixture was pumped through the microreactor (residence time of 1 h) while being exposed to UVA light. The work-up, product analysis and purification steps were the same as for the batch system.

**9b-Hydroxy-1,2,3,9b-tetrahydro-5H-pyrrolo[2,1-a]isoindol-5-one (4).** Colorless solid;  $R_f$ : 0.30; mp 125–127 °C (lit. [4]: mp 123–125 °C);  $^1\text{H}$  NMR (400 MHz, acetone- $d_6$ )  $\delta$  1.50 (m, 1H,  $\text{CH}_2$ ), 2.24 (m, 2H,  $\text{CH}_2$ ), 2.53 (m, 1H,  $\text{CH}_2$ ), 3.32 (m, 1H,  $\text{NCH}_2$ ), 3.57 (m, 1H,  $\text{NCH}_2$ ), 5.22 (s, 1H, OH), 7.48 (m, 1H,  $\text{H}_{\text{arom}}$ ), 7.57 (m, 3H,  $\text{H}_{\text{arom}}$ ) ppm;  $^{13}\text{C}$  NMR (100 MHz, acetone- $d_6$ )  $\delta$  28.3, 36.0, 42.1, 96.9, 123.5, 123.7, 130.1, 133.0, 133.2, 149.2, 170.1 ppm.

**N-Propylphthalimide (5).**  $R_f$ : 0.68;  $^1\text{H}$  NMR (400 MHz, acetone- $d_6$ )  $\delta$  0.90 (t,  $^3J = 7.4$  Hz, 3H,  $\text{CH}_3$ ), 1.65 (q,  $^3J = 7.4$  Hz, 2H,  $\text{CH}_2$ ), 3.59 (t,  $^3J = 7.4$  Hz, 2H,  $\text{NCH}_2$ ), 7.84 (m, 4H,  $\text{H}_{\text{arom}}$ ) ppm.

**9b-Hydroxy-1,9b-dihydrothiazolo[4,3-a]isoindol-5-one (7).** Colorless solid;  $R_f$ : 0.31; mp 121–122 °C (lit [5]: 124–125 °C);  $^1\text{H}$  NMR (400 MHz, acetone- $d_6$ )  $\delta$  2.97 (d,  $^2J = 11.2$  Hz, 1H,  $\text{CH}_2\text{S}$ ), 3.39 (d,  $^2J = 11.2$  Hz, 1H,  $\text{CH}_2\text{S}$ ), 4.36 (d,  $^2J = 8.8$  Hz, 1H,  $\text{NCH}_2\text{S}$ ), 4.93 (d,  $^2J = 8.8$  Hz, 1H,  $\text{NCH}_2\text{S}$ ), 5.83 (s, 1H, OH), 7.57 (m, 1H,  $\text{H}_{\text{arom}}$ ), 7.64 (dd,  $^3J = 7.6$  Hz,  $^4J = 1.2$  Hz, 1H,  $\text{H}_{\text{arom}}$ ), 7.71 (m, 2H,  $\text{H}_{\text{arom}}$ ) ppm;  $^{13}\text{C}$  NMR (100 MHz, acetone- $d_6$ )  $\delta$  40.2, 42.7, 98.4, 123.4, 123.9, 130.8, 131.3, 134.1, 147.6, 167.9 ppm.

**Photodecarboxylative additions of 8 and 11 to 2 under batch conditions:** A solution of **2** (1.5 mmol), DMBP (0.15 mmol) and **8** or **11** (4.5 mmol) in an acetonitrile/water mixture (1:1 vol %, 100 mL) was irradiated for 1 h while being degassed with nitrogen. Most of the acetonitrile was evaporated and the crude product mixture was extracted with  $\text{CH}_2\text{Cl}_2$  (3  $\times$  50 mL). The combined organic layer was washed with sat.  $\text{NaHCO}_3$  (2  $\times$  50 mL), brine (2  $\times$  50 mL), dried over  $\text{MgSO}_4$ , filtered and evaporated. The composition was determined by  $^1\text{H}$  NMR spectroscopy of the crude product. Conversions were established by comparing the NMR integration values of the  $\text{NCH}_3$  signals. The ratio of **12/13** was calculated by

comparing the integration of a  $\text{CH}_2\text{S}$  proton of **12** with the  $\text{CHN}$  proton of **13**. Pure **12** or **13** were isolated by column chromatography.

**Photodecarboxylative additions of 8 and 11 to 2 under microflow conditions:** A solution of **2** (0.225 mmol), DMBP (22.5  $\mu\text{mol}$ ) and **8** or **11** (0.675 mmol) in an acetonitrile/water mixture (1:1 vol %, 15 mL) was purged with nitrogen and loaded into a syringe pump. The reaction mixture was pumped through the microreactor while being exposed to light for 1 h. The workup procedure and product analysis were the same as for the batch system.

**(3E)-3-Benzylidene-2-methylisoindolin-1-one (10).**  $R_f$ : 0.55;  $^1\text{H}$  NMR (400 MHz, acetone- $d_6$ ):  $\delta$  3.36 (s, 3H,  $\text{NCH}_3$ ), 6.69 (s, 1H,  $\text{H}_{\text{olef}}$ ), 7.35 (d,  $^3J = 7.6$  Hz, 1H,  $\text{H}_{\text{arom}}$ ), 7.41 (m, 2H,  $\text{H}_{\text{arom}}$ ), 7.48 (m, 5H,  $\text{H}_{\text{arom}}$ ), 7.75 (d,  $^3J = 7.6$  Hz, 1H,  $\text{H}_{\text{arom}}$ ) ppm;  $^{13}\text{C}$  NMR (100 MHz,  $\text{CDCl}_3$ )  $\delta$  26.3, 110.4, 123.1, 127.9, 128.8, 129.3, 129.7, 130.8, 131.6, 134.0, 135.0, 135.4, 137.6, 166.7 ppm.

**3-Hydroxy-2-methyl-3-(methylthiomethyl)isoindolin-1-one (12).** Colorless solid;  $R_f$ : 0.26; mp 110–114  $^\circ\text{C}$  (lit. [5]: 114–116  $^\circ\text{C}$ );  $^1\text{H}$  NMR (400 MHz, acetone- $d_6$ ):  $\delta$  1.76 (s, 3H,  $\text{SCH}_3$ ), 2.92 (s, 3H,  $\text{NCH}_3$ ), 3.20 (d,  $^2J = 14.0$  Hz, 1H,  $\text{CH}_2$ ), 3.27 (d,  $^2J = 14.0$  Hz, 1H,  $\text{CH}_2$ ), 5.47 (s, 1H, OH), 7.50 (ddd,  $^3J = 7.6$ ,  $^3J = 7.6$ ,  $^4J = 1.2$  Hz, 1H,  $\text{H}_{\text{arom}}$ ), 7.58 (ddd,  $^3J = 7.6$ ,  $^3J = 7.6$ ,  $^4J = 1.2$  Hz, 1H,  $\text{H}_{\text{arom}}$ ), 7.64 (dd,  $^3J = 7.6$ ,  $^4J = 1.2$  Hz, 1H,  $\text{H}_{\text{arom}}$ ), 7.71 (dd,  $^3J = 7.6$ ,  $^4J = 1.2$  Hz, 1H,  $\text{H}_{\text{arom}}$ ) ppm;  $^{13}\text{C}$  NMR (100 MHz, acetone- $d_6$ ):  $\delta$  16.7, 23.5, 40.8, 90.9, 123.1, 123.3, 130.2, 132.5, 133.1, 147.8, 167.1 pm.

**3-Hydroxy-2-methyl-1,3-dihydroisoindol-1-one (13).** Colorless solid;  $R_f$ : 0.16; mp 127–129  $^\circ\text{C}$  (lit. [6]: 128–129  $^\circ\text{C}$ );  $^1\text{H}$  NMR (400 MHz,  $\text{CDCl}_3$ )  $\delta$  3.04 (s, 3H,  $\text{NCH}_3$ ), 5.40 (d,  $^3J = 9.6$  Hz, 1H, OH), 5.78 (d,  $^3J = 9.6$  Hz, 1H, CHN), 7.50 (m, 1H,  $\text{H}_{\text{arom}}$ ), 7.60 (m, 2H,  $\text{H}_{\text{arom}}$ ), 7.65 (d,  $^3J = 7.6$  Hz, 1H,  $\text{H}_{\text{arom}}$ ) ppm;  $^{13}\text{C}$  NMR (100 MHz,  $\text{CDCl}_3$ )  $\delta$  26.0, 83.5, 122.8, 123.1, 131.2, 132.0, 133.8, 143.8, 167.6 pm.

**Photodecarboxylative addition of 11 to DMBP under batch conditions:** A solution of DMBP (0.075 mmol) and **11** (2.25 mmol) in an acetonitrile/water mixture (1:1 vol %, 50 mL) was irradiated for 1 hour while a gentle stream of nitrogen was passed through the solution. Most of the acetonitrile was evaporated and the crude product mixture was extracted with CH<sub>2</sub>Cl<sub>2</sub> (3 × 50 mL). The combined organic layer was washed with sat. NaHCO<sub>3</sub> (2 × 50 mL), brine (2 × 50 mL), dried over MgSO<sub>4</sub>, filtered and evaporated. The crude product was analyzed by <sup>1</sup>H NMR spectroscopy. The ratio of **14/15** was calculated by comparing integrations for CH<sub>arom</sub> protons.

**1,1-Bis(4-methoxyphenyl)-2-(methylthio)ethanol (14).** <sup>1</sup>H NMR (400 MHz, acetone-*d*<sub>6</sub>) δ 1.96 (s, 3H, SCH<sub>3</sub>), 3.41 (s, 2H, CH<sub>2</sub>S), 3.76 (s, 6H, OCH<sub>3</sub>), 4.38 (s, 1H, OH), 6.84 (d, <sup>3</sup>*J* = 9.2 Hz, 4H, H<sub>arom</sub>), 7.39 (d, <sup>3</sup>*J* = 9.2 Hz, 4H, H<sub>arom</sub>) ppm.

**1,1,2,2-Tetrakis(4-methoxyphenyl)ethane-1,2-diol (15).** <sup>1</sup>H NMR (400 MHz, acetone-*d*<sub>6</sub>) δ 3.72 (s, 12H, OCH<sub>3</sub>), 4.47 (s, 2H, OH), 6.65 (d, <sup>3</sup>*J* = 9.2 Hz, 8H, H<sub>arom</sub>), 7.31 (d, <sup>3</sup>*J* = 9.2 Hz, 8H, H<sub>arom</sub>) ppm.

## References

1. Griesbeck, A. G.; Henz, A.; Kramer, W.; Lex, J.; Nerowski, F.; Oelgemöller, M.; Peters, K.; Peters, E.-M. *Helv. Chim. Acta*, **1997**, *80*, 912–933. doi:10.1002/hlca.19970800324
2. Griesbeck, A. G.; Oelgemöller, M.; Lex, J.; Haeuseler, A.; Schmittel, M. *Eur. J. Org. Chem.*, **2001**, 1831–1843. doi:10.1002/1099-0690(200105)2001:10<1831::AID-EJOC1831>3.0.CO;2-7
3. Schindlbauer, H. *Monatsh. Chem.* **1973**, *104*, 848–853. doi:10.1007/BF00910596

4. Lee, Y. J.; Ling, R.; Mariano, P. S.; Yoon, U. C.; Kim, D. U.; Oh, S. W. *J. Org. Chem.*, **1996**, *61*, 3304–3314. doi:10.1021/jo9522623
5. Hatanaka, Y.; Sato, Y.; Nakai, H.; Wada, M.; Mizuguchi, T.; Kanaoka, Y. *Liebigs Ann. Chem.*, **1992**, 1113–1123. doi:10.1002/jlac.1992199201184
6. Ress, C. W.; Sabet, C. R. *J. Chem. Soc.* **1965**, 687–691.
